# Supplementary material for: Climate, ocean circulation, and sea level changes under stabilizationand overshoot pathways to 1.5 K warming
Source: Copernicus journal article supplement (doi:10.5194/esd-2017-105), 2017-11-27
Supplement: Supplementary file 1 [file esd-2017-105-supplement.pdf]

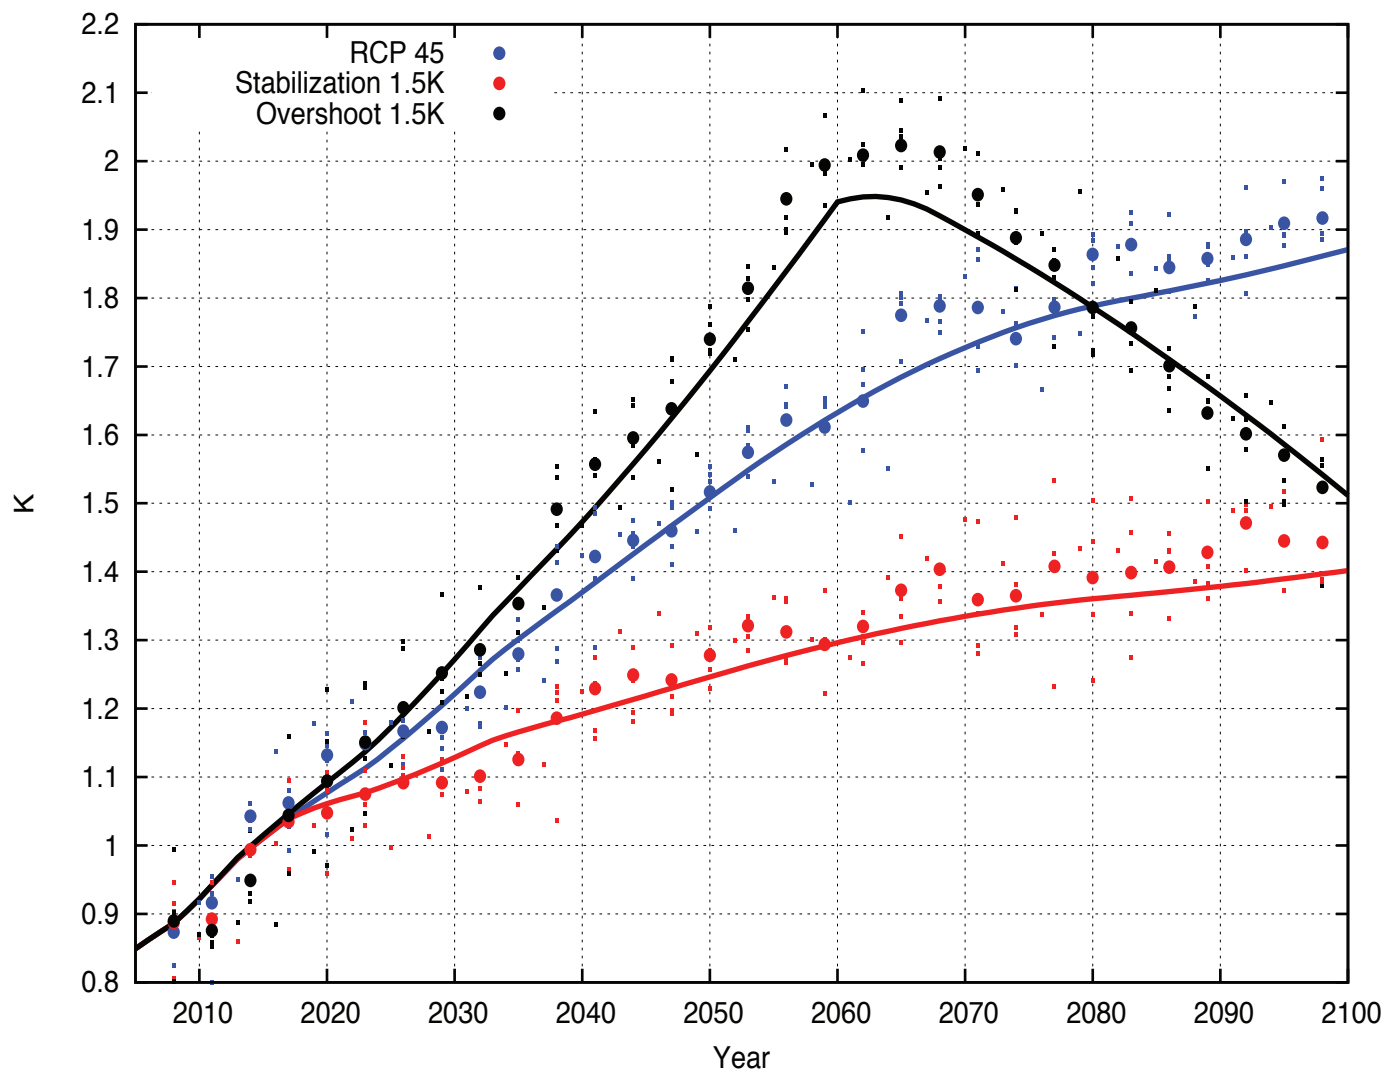

Figure S1: Global mean temperature change in the ESM2M climate simulations (5-year running means; small dots for individual ensemble members, large dots for ensemble means) and the simple scaling described in Equation 1 of the main text (red, blue, and black lines). Red is for stabilization forcing, blue for RCP4.5, and black for overshoot.
